# Supplementary material
Source: MDPI journal article supplement (https://www.mdpi.com/2071-1050/9/4/485)
Supplement: s1 [file s1]

Archive with 2 entries (2 files):
- Supplementary materials 2.pdf
- Suppl material-Tables.pdf
