# Supplementary material
Source: MDPI journal article supplement (https://www.mdpi.com/2071-1050/9/4/485)
Supplement: s1 [file s1 › Suppl material-Tables.pdf]

Table S1. First bird species mentioned by 141 respondents in answer to the question "What are the first bird names that come to your mind?"

| Scientific names                  | Local names             | Origin | N° of mentions | Percentage (%) |
|-----------------------------------|-------------------------|--------|----------------|----------------|
| <i>Columba livia</i>              | Rock dove               | Exotic | 44             | 31%            |
| <i>Myiopsitta monachus</i>        | Monk parakeet           | Exotic | 26             | 18%            |
| <i>Turdus falcklandii</i>         | Austral thrush          | Native | 18             | 13%            |
| <i>Zenaida auriculata</i>         | Eared Dove              | Native | 12             | 8%             |
| <i>Passer domesticus</i>          | House sparrow           | Exotic | 11             | 8%             |
| <i>Curaeus curaeus</i>            | Austral blackbird       | Native | 6              | 5%             |
| <i>Milvago chimango</i>           | Chimango Caracara       | Native | 5              | 3%             |
| <i>Vanellus chilensis</i>         | Southern Lapwing        | Native | 3              | 3%             |
| <i>Zonotrichia capensis</i>       | Rufous-collared Sparrow | Native | 3              | 2%             |
| <i>Molothrus bonariensis</i>      | Shiny cowbird           | Native | 2              | 2%             |
| <i>Tachycineta meyeri</i>         | Chilean Swallow         | Native | 2              | 1%             |
| Other species mentioned only once | ---                     | ---    | 10             | 6%             |

Table S2a. Linear regression between bird abundance (mean birds/point/day) and the frequently named birds.

|                      | <i>B</i>      | <i>CI</i>      | <i>p</i> |
|----------------------|---------------|----------------|----------|
| (Intercept)          | 5.94          | -20.29 – 32.17 | 0.615    |
| Bird mean abundances | 8.66          | 1.19 – 16.14   | 0.028    |
| Observations         | 10            |                |          |
| R2 / adj. R2         | 0.472 / 0.406 |                |          |

Table S2b. Linear regression between bird abundance (mean birds/point/day) and the number of correct identifications of each species.

|                      | <i>B</i>      | <i>CI</i>      | <i>p</i> |
|----------------------|---------------|----------------|----------|
| (Intercept)          | 15.28         | -27.94 – 58.50 | 0.439    |
| Bird mean abundances | 10.42         | -1.89 – 22.74  | 0.087    |
| Observations         | 10            |                |          |
| R2 / adj. R2         | 0.323 / 0.238 |                |          |
