# Supplementary material
Source: MDPI journal article supplement (https://www.mdpi.com/2071-1050/9/4/485)
Supplement: s1 [file s1 › Supplementary materials 2.pdf]

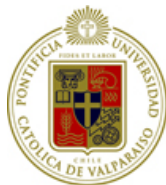

### ENCUESTA DE OPINION

Parque y comuna: \_\_\_\_\_

Fecha: \_\_\_\_\_

Comuna (de residencia): \_\_\_\_\_

1. ¿Que edad tiene? \_\_\_\_\_ Sexo: F \_\_\_\_\_ M \_\_\_\_\_  
(**Puede poner un rango**, en caso de que no quiera señalar su edad)
2. ¿Que nivel de estudios tiene?
  - a. Escolar incompleto
  - b. Escolar completo
  - c. Estudios técnicos
  - d. Universitario
  - e. Postgrado
3. ¿Con que frecuencia visita esta plaza?
  - a. Varios días a la semana
  - b. 1 vez por semana
  - c. 1 vez al mes
  - d. Un par de veces al mes
  - e. Nunca
4. ¿Cual es el motivo de la visita a esta plaza?
  - a. Esta en medio de mi camino
  - b. Descanso o recreación
  - c. Pasear con niños o abuelos
  - d. Disfrutar la naturaleza
  - e. Reunirme con alguien
5. ¿Ud. ha observado aves en esta plaza?  
SI \_\_\_\_\_ NO \_\_\_\_\_
6. ¿Porque le gustan las aves? (puede seleccionar mas de 1 opción)
  - a. Me gusta la naturaleza
  - b. Me relaja observarlas
  - c. Me gusta alimentarlas
  - d. Me gustan sus cantos y/o colores
  - e. Por ninguna razón en especial
  - f. Me son indiferentes
7. ¿Aproximadamente cuántas especies distintas de aves estima que ha visto en esta plaza?  
(**Poner un número estimado**)  
\_\_\_\_\_

8. ¿Puede nombrar algunas de las aves que conoce y ha visto en esta plaza? (*Anotar sin al contarlas para la pregunta anterior las nombra*)

a. \_\_\_\_\_

b. \_\_\_\_\_

c. \_\_\_\_\_

d. \_\_\_\_\_

9. ¿A que factores atribuye la presencia de aves en esta plaza? (puede seleccionar mas de 1 opción)

- A los árboles
- Al césped
- Porque las alimentan
- Porque hay pocas personas
- Porque hay poco ruido

Otra razón: \_\_\_\_\_

10. En su opinión, estima que la cantidad de aves que hay en esta plaza es:

- Sólo unas pocas especies
- Normal
- Muchas especies
- No sabe

11. ¿Le gustaría tener mas información de las aves de esta plaza?

SI \_\_\_\_\_

NO \_\_\_\_\_

12. ¿Conoce el nombre de las siguientes aves?

**1** SI \_\_\_\_\_

NO \_\_\_\_\_

2 SI \_\_\_\_\_

NO \_\_\_\_\_

3 SI \_\_\_\_\_

NO \_\_\_\_\_

4 SI \_\_\_\_\_

NO \_\_\_\_\_

5 SI \_\_\_\_\_

NO \_\_\_\_\_

6 SI \_\_\_\_\_

NO \_\_\_\_\_

7 SI \_\_\_\_\_

NO \_\_\_\_\_

8 SI \_\_\_\_\_

NO \_\_\_\_\_

9 SI \_\_\_\_\_

NO

**10** SI \_\_\_\_\_

NO

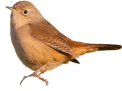

**1. House wren**  
(*Troglodytes aedon*) - Native

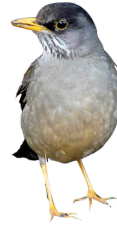

**2. Austral thrush**  
(*Turdus falcklandii*) - Native

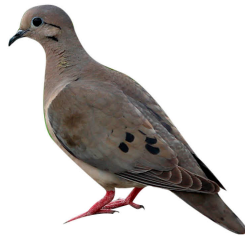

**3. Eared dove**  
(*Zenaida auriculata*) - Native

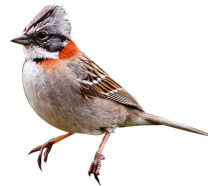

**4. Rufous-collared sparrow**  
(*Zonotrichia capensis*) - Native

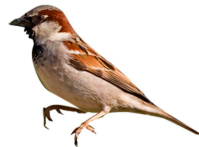

**5. House sparrow**  
(*Passer domesticus*) - Exotic

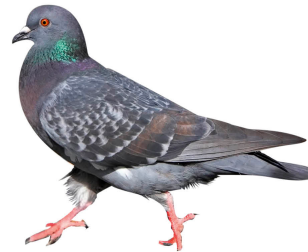

**6. Rock dove**  
(*Columba livia*) - Exotic

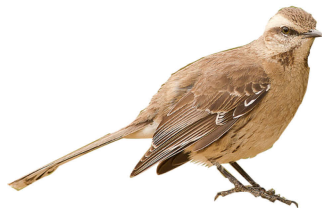

**7. Chilean mockingbird**  
(*Mimus thenca*) - Native

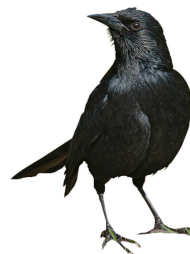

**8. Austral blackbird**  
(*Curaeus curaeus*) - Native

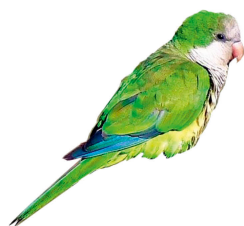

**9. Monk parakeet**  
(*Myopsitta monachus*) - Exotic

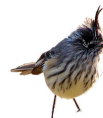

**9. Tufted tit tyrant**  
(*Anairetes parulus*) - Native
